# Supplementary material
Source: PubMed Central journal article supplement (PMC1877093)
Supplement: mbc_E06-09-0883_1.pdf [file mbc_E06-09-0883_1.pdf]

**A**

|                                    | For3-YFP <i>rga4</i> $\Delta$ transformed with | For3-YFP localized at both tips (% cells) | For3-YFP localized at one tip (% cells) | For3-YFP localized all over cortex (% cells) |
|------------------------------------|------------------------------------------------|-------------------------------------------|-----------------------------------------|----------------------------------------------|
| With thiamine                      | pREP3x                                         | 11                                        | 6                                       | 78                                           |
|                                    | pREP3x- <i>HA-rga4</i>                         | 88                                        | 12                                      | 0                                            |
|                                    | pREP3x- <i>HA-rga4-<math>\Delta</math>GAP</i>  | 5                                         | 0                                       | 95                                           |
|                                    | pREP3x- <i>HA-rga4-<math>\Delta</math>N</i>    | 8                                         | 4                                       | 88                                           |
| Without thiamine for 20hrs at 25°C | pREP3x                                         | 12                                        | 8                                       | 80                                           |
|                                    | pREP3x- <i>HA-rga4</i>                         | 80                                        | 20                                      | 0                                            |
|                                    | pREP3x- <i>HA-rga4-<math>\Delta</math>GAP</i>  | 3                                         | 0                                       | 97                                           |
|                                    | pREP3x- <i>HA-rga4-<math>\Delta</math>N</i>    | 70                                        | 30                                      | 0                                            |

**B**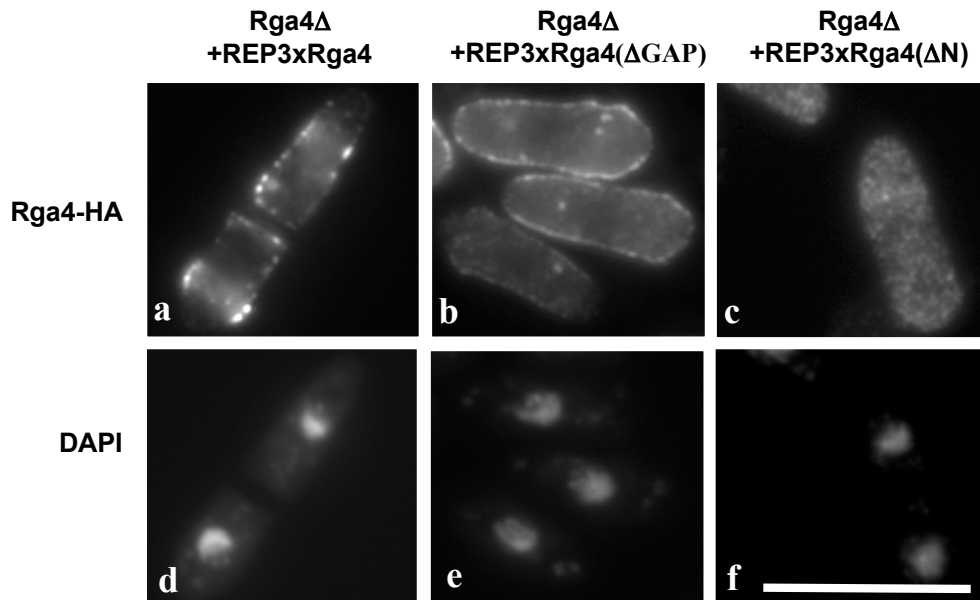**Supplement 1:**

**A.** Effect of different levels of Rga4 expression on For3-YFP localization. Cells were grown in presence of thiamine (uninduced) and in absence of thiamine for 20hrs at 25°C (6 fold induction). The percentage of cells with different patterns of For3-YFP localization were estimated.  $n \geq 47$ .

**B.** Localization of different domains of Rga4-HA expressed in *rga4* $\Delta$  cells. a,d, *rga4* $\Delta$  pREP3x-*HA-rga4*; b,e, *rga4* $\Delta$  pREP3x-*HA-rga4- $\Delta$ GAP*; c,f, *rga4* $\Delta$  pREP3x-*HA-rga4- $\Delta$ N*. a,b,c, HA staining with anti-HA antibody; d,e,f, DAPI visualization.
