# Supplementary material
Source: PubMed Central journal article supplement (PMC1877093)
Supplement: mbc_E06-09-0883_2.pdf [file mbc_E06-09-0883_2.pdf]

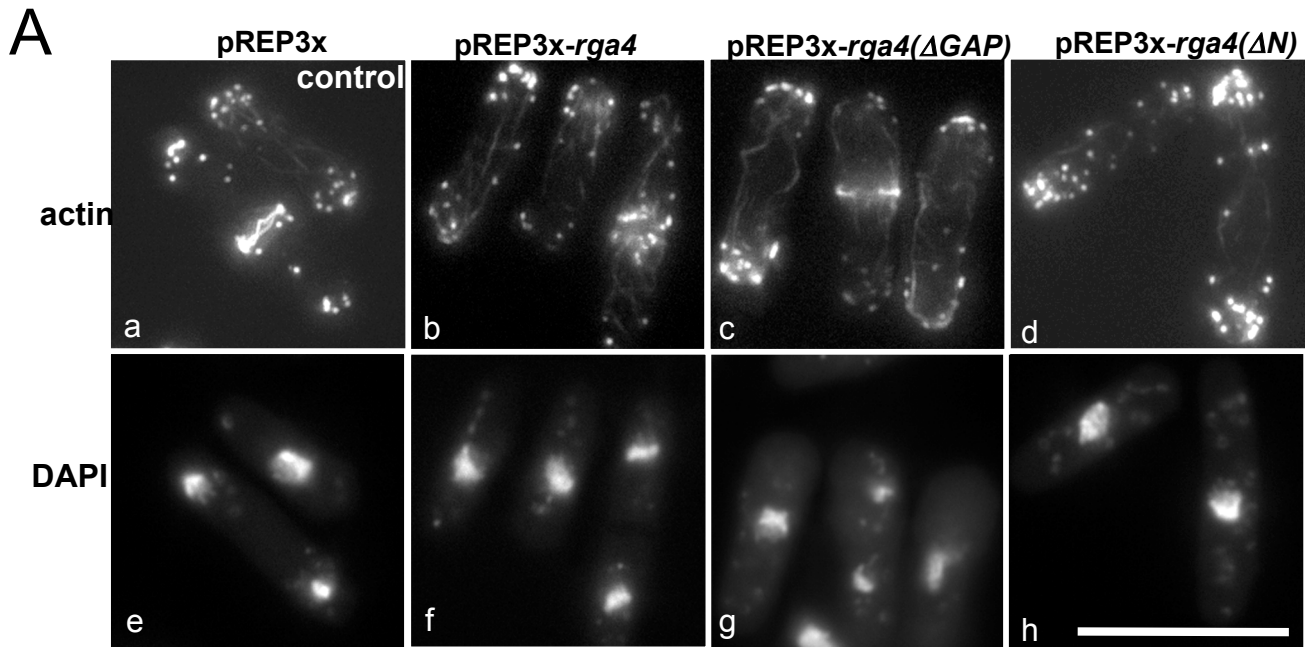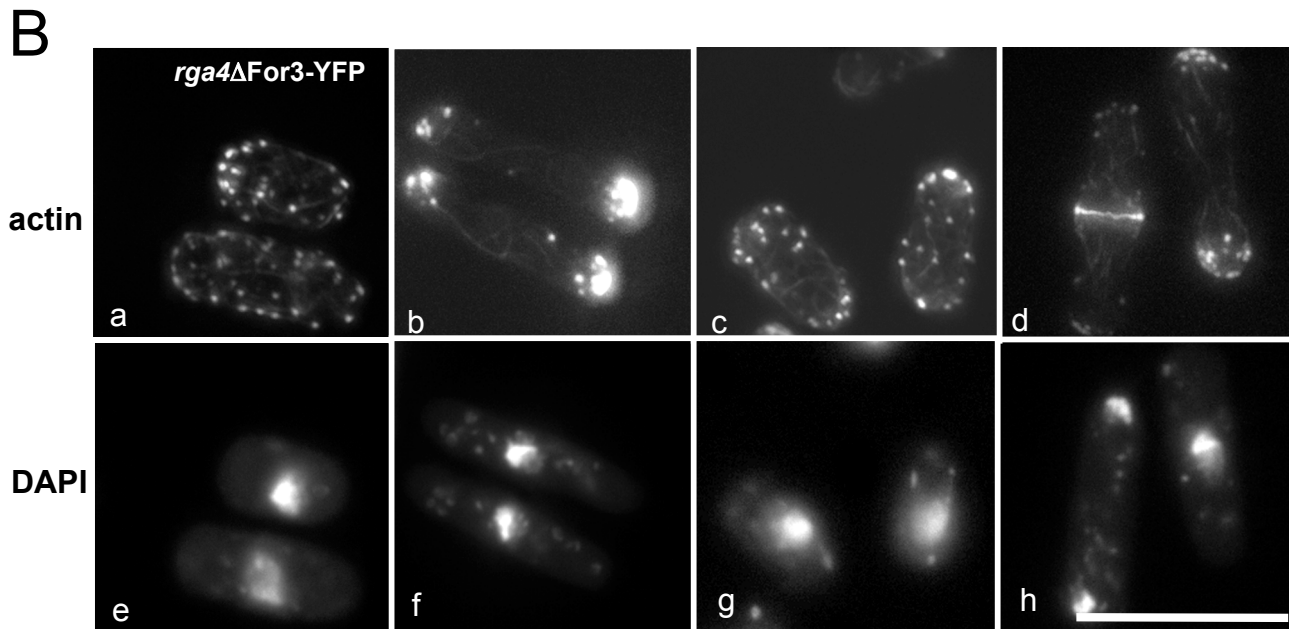

### Supplement 2: Actin organization

**A and B:** a,b,c,d, actin staining with AlexaFluor-phalloidin of cells grown for 20 hrs at 25°C without thiamine; e,f,g,h, DAPI visualization of the same.

**A.** a,e, *leu1-32* cells carrying pREP3X; b,f, *leu1-32* cells carrying pREP3x-*HA-rga4*; c,g, *leu1-32* cells carrying pREP3x-*HA-rga4*- $\Delta$ GAP; d,h, *leu1-32* cells carrying pREP3X-*HA-rga4*- $\Delta$ N.

**B.** a,e, For3-YFP expressing cells carrying pREP3X; b,f, For3-YFP expressing cells carrying pREP3x-*HA-rga4*; c,g, For3-YFP expressing cells carrying pREP3x-*HA-rga4*- $\Delta$ GAP; d,h, For3-YFP expressing cells carrying pREP3X-*HA-rga4*- $\Delta$ N.
